# Supplementary material for: Advancements from the EVOLVE study for assessing real-world experience with eteplirsen, golodirsen and casimersen for the treatment of DMD
Source: Atypon-hosted journal article supplement (doi:10.57264/cer-2025-0108), 2026-04-10
Supplement: supplementary data.docx [file supplementary%20data.docx]

**Supplementary Table 1. Summary of concomitant medications received by ≥10% of patients during the study.**

| **Drug classification generic name** | **Eteplirsen (n = 126) n (%)** | **Golodirsen (n = 23) n (%)** | **Casimersen (n = 12) n (%)** | **Total (N = 161) n (%)** |
| --- | --- | --- | --- | --- |
| **Any medications taken** | **123 (97.6)** | **23 (100)** | **10 (83.3)** | **156 (96.9)** |
| Vitamin D and analogues | 101 (80.2) | 19 (82.6) | 7 (58.3) | 127 (78.9) |
| ACE inhibitors, plain | 88 (69.8) | 21 (91.3) | 9 (75.0) | 118 (73.3) |
| Glucocorticoids | 66 (52.4) | 9 (39.1) | 4 (33.3) | 79 (49.1) |
| Aldosterone antagonists | 54 (42.9) | 14 (60.9) | 6 (50.0) | 74 (46.0) |
| Multivitamins, plain | 33 (26.2) | 9 (39.1) | 1 (8.3) | 43 (26.7) |
| Osmotically acting laxatives | 35 (27.8) | 3 (13.0) | 3 (25.0) | 41 (25.5) |
| Alpha- and beta-blocking agents | 30 (23.8) | 5 (21.7) | 2 (16.7) | 37 (23.0) |
| Calcium | 33 (26.2) | 2 (8.7) | 2 (16.7) | 37 (23.0) |
| Bisphosphonates | 26 (20.6) | 5 (21.7) | 2 (16.7) | 33 (20.5) |
| Selective β2-adrenoreceptor agonists | 29 (23.0) | 3 (13.0) | 1 (8.3) | 33 (20.5) |
| Various alimentary tract and metabolism products | 30 (23.8) | 3 (13.0) | 0 | 33 (20.5) |
| Proton pump inhibitors | 27 (21.4) | 3 (13.0) | 2 (16.7) | 32 (19.9) |
| Anesthetics for topical use | 26 (20.6) | 2 (8.7) | 0 | 28 (17.4) |
| H2-receptor antagonists | 27 (21.4) | 0 | 1 (8.3) | 28 (17.4) |
| 3-oxoandrosten (4) derivatives | 19 (15.1) | 5 (21.7) | 2 (16.7) | 26 (16.1) |
| Anilides | 23 (18.3) | 2 (8.7) | 1 (8.3) | 26 (16.1) |
| Beta-blocking agents, selective | 16 (12.7) | 4 (17.4) | 1 (8.3) | 21 (13.0) |
| Melatonin receptor agonists | 16 (12.7) | 2 (8.7) | 2 (16.7) | 20 (12.4) |
| Heparin group | 17 (13.5) | 0 | 1 (8.3) | 18 (11.2) |
| Other anxiolytics† | 17 (13.5) | 1 (4.3) | 0 | 18 (11.2) |

†Other anxiolytics included amitriptyline, escitalopram, fluoxetine, fluoxetine hydrochloride, paroxetine, sertraline, sertraline hydrochloride, and venlafaxine.

ACE: Angiotensin-converting enzyme.

**Supplementary Table 2. Summary of comorbidities listing at or before EVOLVE study entry.**

| **Event incidence >5%, preferred term** | **Eteplirsen (n = 126) n (%)** |
| --- | --- |
| **Any medical history** | **124 (98.4)** |
| Vitamin D deficiency | 33 (26.2) |
| Constipation | 29 (23.0) |
| Restrictive lung disease | 25 (19.8) |
| Obstructive sleep apnea | 23 (18.3) |
| Osteoporosis | 19 (15.1) |
| Scoliosis | 18 (14.3) |
| Anxiety | 15 (11.9) |
| Cardiomyopathy | 15 (11.9) |
| Obesity | 13 (10.3) |
| Short stature | 13 (10.3) |
| Delayed puberty | 12 (9.5) |
| ADHD | 9 (7.1) |
| Low bone density | 8 (6.3) |
| Acid reflux | 7 (5.6) |
| Dysphagia | 7 (5.6) |
| **Incidence >5%, preferred term** | **Golodirsen (n = 23) n (%)** |
| **Any medical history** | **22 (95.7)** |
| Vitamin D deficiency | 5 (21.7) |
| ADHD | 4 (17.4) |
| Delayed puberty | 4 (17.4) |
| Low bone density | 4 (17.4) |
| Obstructive sleep apnea | 4 (17.4) |
| Speech delay | 4 (17.4) |
| Anxiety | 3 (13.0) |
| Low serum creatine | 3 (13.0) |
| Muscle weakness (generalized) | 3 (13.0) |
| Obesity | 3 (13.0) |
| Acne | 2 (8.7) |
| Adrenal insufficiency | 2 (8.7) |
| Autism | 2 (8.7) |
| Cardiomyopathy | 2 (8.7) |
| Cataracts | 2 (8.7) |
| Constipation | 2 (8.7) |
| Elevated triglycerides | 2 (8.7) |
| Kidney stones | 2 (8.7) |
| Lordosis | 2 (8.7) |
| Low bone density for age | 2 (8.7) |
| Low vit D | 2 (8.7) |
| Low vitamin D | 2 (8.7) |
| Muscle cramping | 2 (8.7) |
| Neuromuscular respiratory weakness | 2 (8.7) |
| Osteoporosis | 2 (8.7) |
| Restrictive lung disease | 2 (8.7) |
| Scoliosis | 2 (8.7) |
| Snoring | 2 (8.7) |
| Weight gain | 2 (8.7) |
| **Event incidence ≥2 patients, preferred term** | **Casimersen (n = 12) n (%)** |
| **Any medical history** | **12 (100.0)** |
| Autism | 3 (25.0) |
| Constipation | 3 (25.0) |
| Low bone mineral density | 3 (25.0) |
| Vitamin D deficiency | 3 (25.0) |
| Allergies | 2 (16.7) |
| Delayed puberty | 2 (16.7) |
| Obstructive sleep apnea | 2 (16.7) |
| Osteopenia | 2 (16.7) |
| Short stature | 2 (16.7) |

ADHD: Attention-deficit hyperactivity disorder.

**Supplementary Table 3. Summary of corticosteroid use in patients prior to and after study enrollment.**

|  | **Eteplirsen (n = 126)** | **Golodirsen (n = 23)** | **Casimersen (n = 12)** | **Total (N = 161)** |
| --- | --- | --- | --- | --- |
| **Prior to enrollment or at or after PMO initiation** | | | | |
| Patients who received corticosteroid treatment in the past 12 months prior to enrollment, n (%) | 112 (88.9) | 21 (91.3) | 10 (83.3) | 143 (88.8) |
| Patients who received corticosteroid treatment prior to the initiation of eteplirsen/golodirsen/casimersen, n (%) | 76 (60.3) | 20 (87.0) | 10 (83.3) | 106 (65.8) |
| Patients who received corticosteroid treatment at or after the initiation of eteplirsen/golodirsen/casimersen, n (%) | 114 (90.5) | 21 (91.3) | 11 (91.7) | 146 (90.7) |
| **Type of corticosteroid treatment at any time prior to enrollment, n (%)** | | | | |
| Prednisone | 58 (46.0) | 10 (43.5) | 5 (41.7) | 73 (45.3) |
| Deflazacort | 26 (20.6) | 11 (47.8) | 7 (58.3) | 44 (27.3) |
| Anabolic steroid | 0 | 0 | 0 | 0 |
| **Age at first use of corticosteroid treatment, years** | | | | |
| n | 116 | 21 | 11 | 148 |
| Mean (SD) | 8.85 (4.30) | 8.17 (3.59) | 10.63 (7.19) | 8.88 (4.48) |
| Median | 8.00 | 6.94 | 7.67 | 7.76 |
| Min, max | 1.7, 22.9 | 3.0, 16.4 | 4.7, 29.7 | 1.7, 29.7 |
| **After enrollment** | | | | |
| Patients who received corticosteroid treatment after enrollment, n (%) | 36 (28.6) | 4 (17.4) | 3 (25.0) | 43 (26.7) |
| **Type of corticosteroid treatment at any time after enrollment, n (%)** | | | | |
| Prednisone | 18 (14.3) | 4 (17.4) | 3 (25.0) | 25 (15.5) |
| Deflazacort | 24 (19.0) | 0 | 1 (8.3) | 25 (15.5) |
| Prednisone and deflazacort† | 6 (4.8) | 0 | 1 (8.3) | 7 (4.3) |
| Other | 0 | 0 | 0 | 0 |
| **Age at first use of corticosteroid treatment after enrollment, years** | | | | |
| n | 36 | 4 | 3 | 43 |
| Mean (SD) | 12.79 (3.61) | 9.44 (2.57) | 9.03 (2.04) | 12.22 (3.65) |
| Median | 13.14 | 9.05 | 10.10 | 12.05 |
| Min, max | 4.7, 21.7 | 7.1, 12.5 | 6.7, 10.3 | 4.7, 21.7 |

†Prednisone and deflazacort have been counted in repeats as prednisone only/deflazacort only.
PMO: Phosphorodiamidate morpholino oligomer; SD: standard deviation.

**Supplementary Table 4. Summary of corticosteroid use in young patients (age at PMO treatment initiation <84 months).**

|  | **Patients aged 24 to <48 months at PMO initiation** | **Patients aged 48 to <84 months at PMO initiation** | | | |
| --- | --- | --- | --- | --- | --- |
|  | **Eteplirsen (n = 8)** | **Eteplirsen (n = 21)** | **Golodirsen (n = 2)** | **Casimersen (n = 1)** | **Total (n = 24)** |
| Patients who received corticosteroid treatment prior to the initiation of eteplirsen/golodirsen/casimersen, n (%) | 2 (25.0) | 11 (52.4) | 1 (50.0) | 0 | 12 (50.0) |
| Patients who received corticosteroid treatment at or after the initiation of eteplirsen/golodirsen/casimersen, n (%) | 6 (75.0) | 20 (95.2) | 2 (100) | 1 (100) | 23 (95.8) |
| **Type of corticosteroid treatment at any time prior to enrollment, n (%)** | | | | | |
| Prednisone | 2 (25.0) | 8 (38.1) | 1 (50.0) | 0 | 9 (37.5) |
| Deflazacort | 0 | 3 (14.3) | 0 | 0 | 3 (12.5) |
| Anabolic steroid | 0 | 0 | 0 | 0 | 0 |
| Other | 0 | 0 | 0 | 0 | 0 |
| **Age at first use of corticosteroid treatment, years** | | | | | |
| n | 6 | 20 | 2 | 1 | 23 |
| Mean (SD) | 4.25 (0.94) | 6.12 (1.67) | 5.36 (1.67) | 6.68 (–) | 6.08 (1.61) |
| Median | 4.42 | 5.67 | 5.36 | 6.68 | 5.90 |
| Min, max | 2.9, 5.3 | 4.1, 9.4 | 4.2, 6.5 | 6.7, 6.7 | 4.1, 9.4 |

PMO: Phosphorodiamidate morpholino oligomer; SD: standard deviation.
